# Supplementary material
Source: PubMed Central journal article supplement (PMC9840113)
Supplement: mmc1.pdf [file mmc1.pdf]

**YMTHE, Volume 31**

**Supplemental Information**

**Targeted genomic translocations  
and inversions generated using  
a paired prime editing strategy**

**Jiyeon Kweon, Hye-Yeon Hwang, Haesun Ryu, An-Hee Jang, Daesik Kim, and Yongsub Kim**

**Figure S1. Analysis of Cas9-mediated DNA recombination in episomal reporter system.**  
 Targeted sequencing results of amplicons generated using recombination-specific primers.

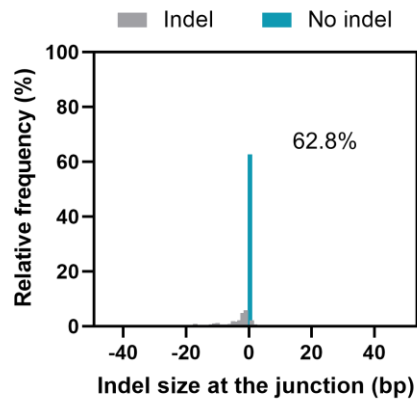

**Direct junction**

| Sequence                                      | Count | Percentage |
|-----------------------------------------------|-------|------------|
| GATCCGGCACTGCGGCTGGAGGCGTGCTCAGTCTGGGCCAGCCAC | 3211  | (55.9%)    |
| GATCCGGCACTGCGGCTGGAGG-GTGCTCAGTCTGGGCCAGCCAC | 223   | (3.8%)     |
| GATCCGGCACTGCGGCTGGAG--GTGCTCAGTCTGGGCCAGCCAC | 213   | (3.7%)     |
| GATCCGGCACTGCGGCTGGAG---GCTCAGTCTGGGCCAGCCAC  | 67    | (1.2%)     |
| GATCCGGCACTGCGGCTGGA-GCTGCTCAGTCTGGGCCAGCCAC  | 62    | (1.1%)     |
| GATCCGGCACTGCGGCTGGAGGACGTGCTCAGTCTGGGCCAGCCA | 46    | (0.8%)     |
| GATCCGGCACTGCGGCTGGGG---GCTCAGTCTGGGCCAGCCAC  | 45    | (0.7%)     |

**Figure S2. Analysis of PETI-mediated genomic translocation in reporter integrated cells.**  
 Targeted sequencing results of amplicons generated using translocation-specific primers.

■ Indel   ■ No indel   ■ 3bp insertion

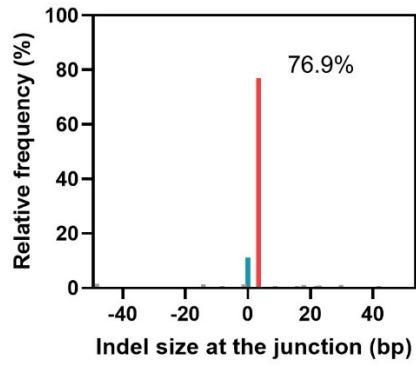

**3bp insertion**

|                                                           |                     |
|-----------------------------------------------------------|---------------------|
| GATCCGGCACTGCGGCTGGAGG---CGTGCTCAGTCTGGGCCAGCCAC          | Ref. (total: 10680) |
| GATCCGGCACTGCGGCTGGAGG <b>ACG</b> CGTGCTCAGTCTGGGCCAGCCAC | 6916 (64.8%)        |
| GATCCGGCACTGCGGCTGGAGG---CGTGCTCAGTCTGGGCCAGCCAC          | 1002 (9.4%)         |
| GATCCGGCAC-----TGCTCAGTCTGGGCCAGCCAC                      | 135 (1.3%)          |
| GATCCGGCACTGCGGCTGGAGG---GTGCTCAGTCTGGGCCAGCCAC           | 115 (1.1%)          |
| GATCCGGCACTGCGGCTGGAGG-----GTCTGGGCCAGCCAC                | 67 (0.6%)           |

**Figure S3. PCR assay for HEK3-HEK4 translocations in HEK293T cells.** (a) PCR products were amplified by translocation-specific primers, either H3F (HEK3 forward) and H4R (HEK4 reverse) or H4F (HEK4 forward) and H3R (HEK3 reverse). (b,c) PE2-nuclease mediated insertion of a restriction enzyme site at translocation junctions.

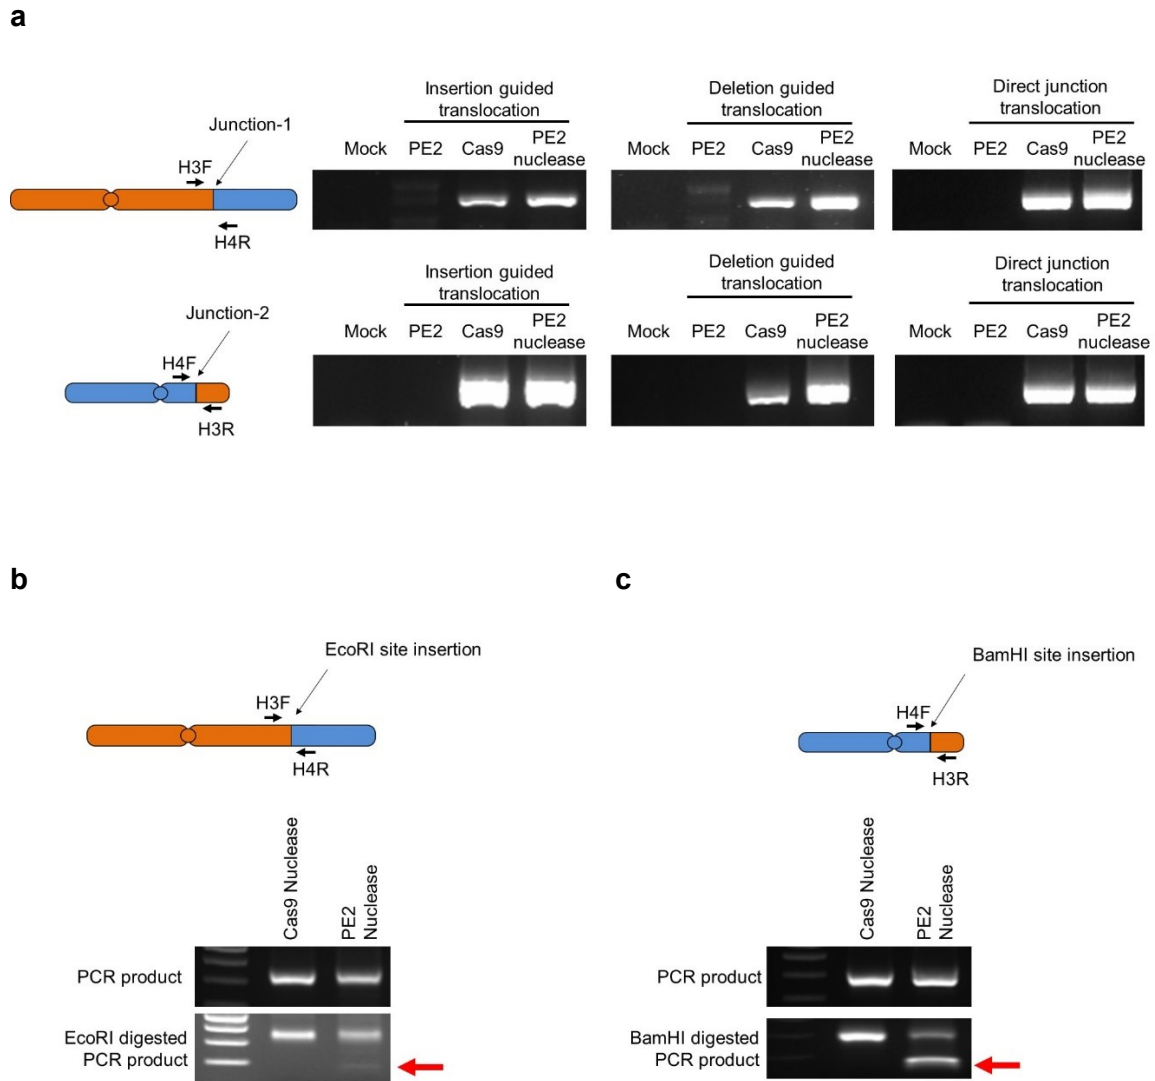

**Figure S4. Estimation of HEK3-HEK4 translocation frequencies.** The frequencies of translocations were estimated by digital PCR analysis using serially diluted samples. Genomic DNA samples isolated from Cas9 or PE2 nuclease treated cells were serially diluted in distilled water and diluted samples were then subjected to nested PCR using appropriate primers. Critical dilution points that support the amplification of breakpoint junctions were determined. The results were analyzed using the Extreme Limiting Dilution Analysis program (<http://bioinf.wehi.edu.au/software/elda/>).<sup>1</sup>

| Dosage | Cas9       |          |            |          | PE2 nuclease     |          |        |          |                 |          |        |          |                        |          |        |          |
|--------|------------|----------|------------|----------|------------------|----------|--------|----------|-----------------|----------|--------|----------|------------------------|----------|--------|----------|
|        | Junction-1 |          | Junction-2 |          | Insertion guided |          |        |          | Deletion guided |          |        |          | Direct junction guided |          |        |          |
|        | Tested     | Response | Tested     | Response | Tested           | Response | Tested | Response | Tested          | Response | Tested | Response | Tested                 | Response | Tested | Response |
| 66     | 12         | 1        | 12         | 1        | 12               | 0        | 12     | 0        | 12              | 0        | 12     | 0        | 12                     | 0        | 12     | 0        |
| 660    | 24         | 5        | 24         | 9        | 24               | 4        | 24     | 12       | 24              | 2        | 24     | 11       | 24                     | 2        | 24     | 4        |
| 3300   | 12         | 6        | 12         | 9        | 12               | 5        | 12     | 10       | 12              | 4        | 12     | 12       | 12                     | 7        | 12     | 8        |

**Figure S5. Types of translocations induced by DNA DSBs.** Schematic of the chromosomal translocations induced by DNA DSBs. When two DSBs are induced simultaneously in different chromosomes, translocations can cause four different types of genomic rearrangements, two of reciprocal translocations, dicentric chromosome, acentric chromosome.

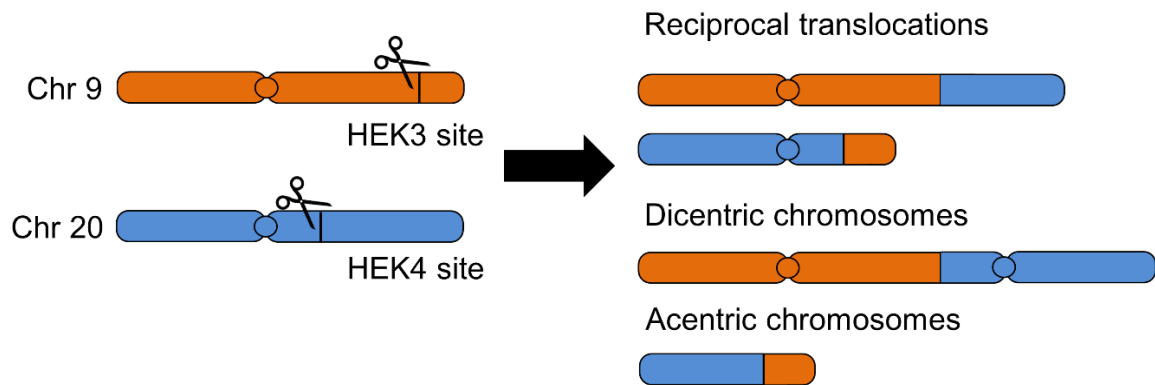

**Figure S6. Off-target analysis of HEK3 and HEK4 target sites.** Mutation frequencies induced by PE2, PE2 nuclease, or Cas9 nuclease at the HEK3 and HEK4 on- and off-target sites.

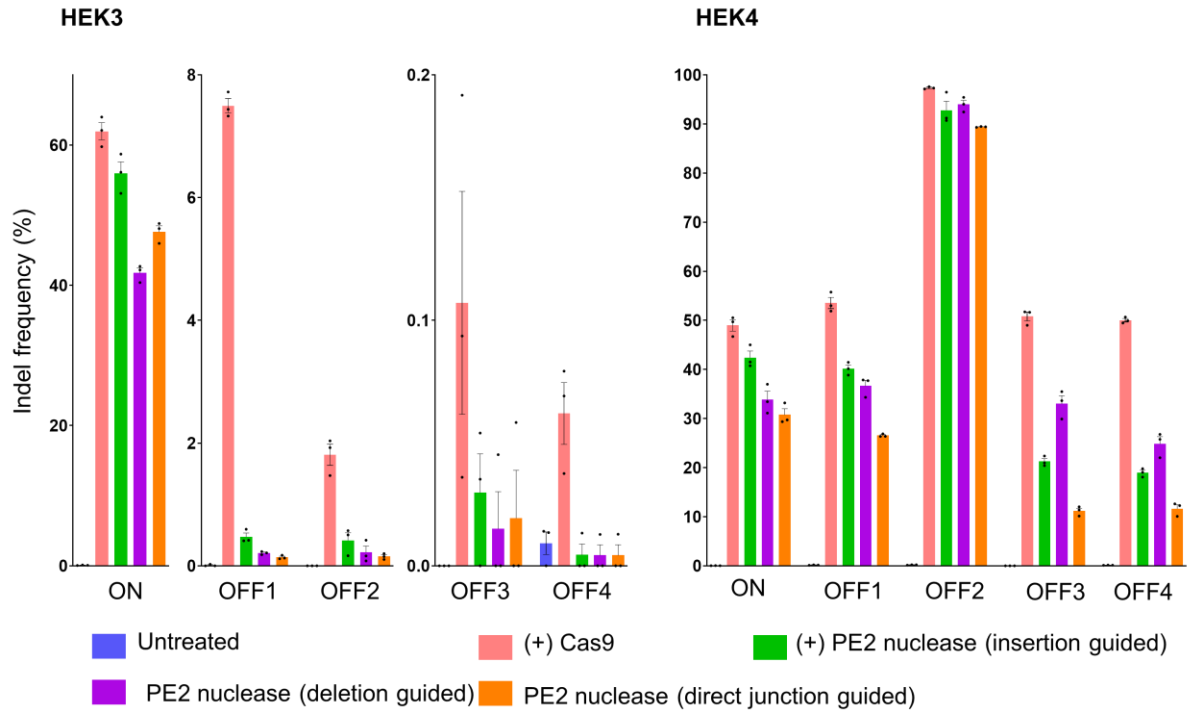

|      |                         |
|------|-------------------------|
| ON   | GGCCCAGACTGAGCACGTGATGG |
| OFF1 | caCCCAGACTGAGCACGTGcTGG |
| OFF2 | aGctCAGACTGAGCAaGTGAGGG |
| OFF3 | GagCCAGaATGAGCACGTGAGGG |
| OFF4 | GGCCCAGACTGAGCAaaaGAAGG |

|      |                         |
|------|-------------------------|
| ON   | GGCACTGCGGCTGGAGGTGGGGG |
| OFF1 | GGCAaTGCGGCTGGAGGcGGAGG |
| OFF2 | GGCACgaCGGCTGGAGGTGGGGG |
| OFF3 | GGCACTGctGCTGGgGGTGGTGG |
| OFF4 | aGCAGTGCGGCTaGAGGTGGTGG |

**Figure S7. Estimation of translocation frequencies between HEK3 on-target site and HEK4 off-target sites.** The frequencies of translocations between HEK3 on-target site and HEK4 off-target sites were estimated by digital PCR analysis as mentioned in Supplementary Figure 4.

| Dosage | HEK3 - HEK4 OFF1 |          |            |          |              |          |            |          | HEK3 - HEK4 OFF2 |          |            |          |              |          |            |          |   |
|--------|------------------|----------|------------|----------|--------------|----------|------------|----------|------------------|----------|------------|----------|--------------|----------|------------|----------|---|
|        | Cas9             |          |            |          | PE2 nuclease |          |            |          | Cas9             |          |            |          | PE2 nuclease |          |            |          |   |
|        | Junction-1       |          | Junction-2 |          | Junction-1   |          | Junction-2 |          | Junction-1       |          | Junction-2 |          | Junction-1   |          | Junction-2 |          |   |
| pg     | Tested           | Response | Tested     | Response | Tested       | Response | Tested     | Response | Tested           | Response | Tested     | Response | Tested       | Response | Tested     | Response |   |
| 20000  | 1                | 1        | 1          | 1        | 5            | 4        | 1          | 1        | -                | -        | -          | -        | 4            | 3        | 4          | 4        |   |
| 10000  | 1                | 1        | 1          | 1        | 5            | 3        | 1          | 1        | 5                | 5        | 5          | 5        | 5            | 2        | 5          | 3        |   |
| 5000   | 5                | 4        | 1          | 1        | 5            | 1        | 5          | 4        | 5                | 4        | 5          | 5        | 5            | 1        | 5          | 2        |   |
| 2500   | 5                | 3        | 5          | 5        | 1            | 0        | 5          | 1        | 5                | 2        | 5          | 2        | 5            | 0        | 5          | 0        |   |
| 1250   | 5                | 3        | 5          | 2        | 1            | 0        | 5          | 0        | 5                | 1        | 5          | 2        | 1            | 0        | 1          | 0        |   |
| 625    | 1                | 0        | 5          | 0        | 1            | 0        | 1          | 0        | 1                | 1        | 1          | 0        | 1            | 0        | 1          | 0        |   |
| 313    | 1                | 0        | 1          | 0        | 1            | 0        | 1          | 0        | 1                | 0        | 1          | 0        | 1            | 0        | 1          | 0        |   |
| 156    | 1                | 0        | 1          | 0        | 1            | 0        | 1          | 0        | 1                | 0        | 1          | 0        | 1            | 0        | 1          | 0        |   |
| 78     | -                | -        | -          | -        | -            | -        | -          | -        | -                | 1        | 0          | 1        | 0            | 1        | 0          | 1        | 0 |



**Figure S8. PCR assay for *NPM1-ALK* and *KIF5B-ALK* translocations in HEK293T cells.**  
 (a,b) Detection of PE2-, Cas9 nuclease-, or PE2 nuclease-mediated translocations using translocation-specific primers. (c) Schematic of the *NPM1-ALK* fusion transcript (left). Detection of the *NPM1-ALK* fusion transcript by RT-PCR using total RNA as template (right).

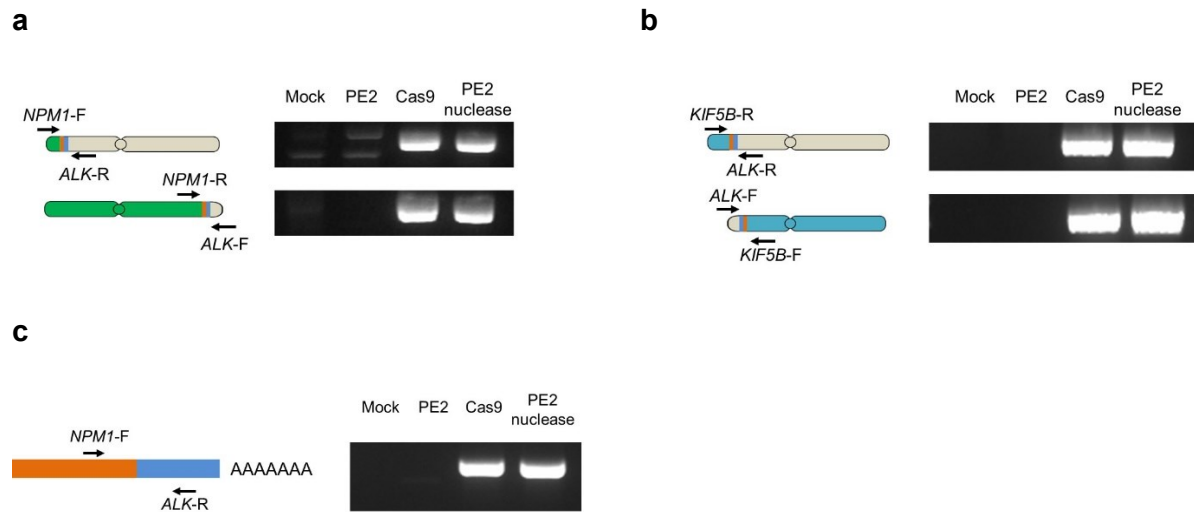



**Figure S10. Chromosomal rearrangements in A549 cell lines.** (a) Sequencing results of targeted amplicon amplified using translocation-specific primers in A549 cells. (b) Sequencing results of targeted amplicon amplified using inversion-specific primers in A549 cells.

**a**

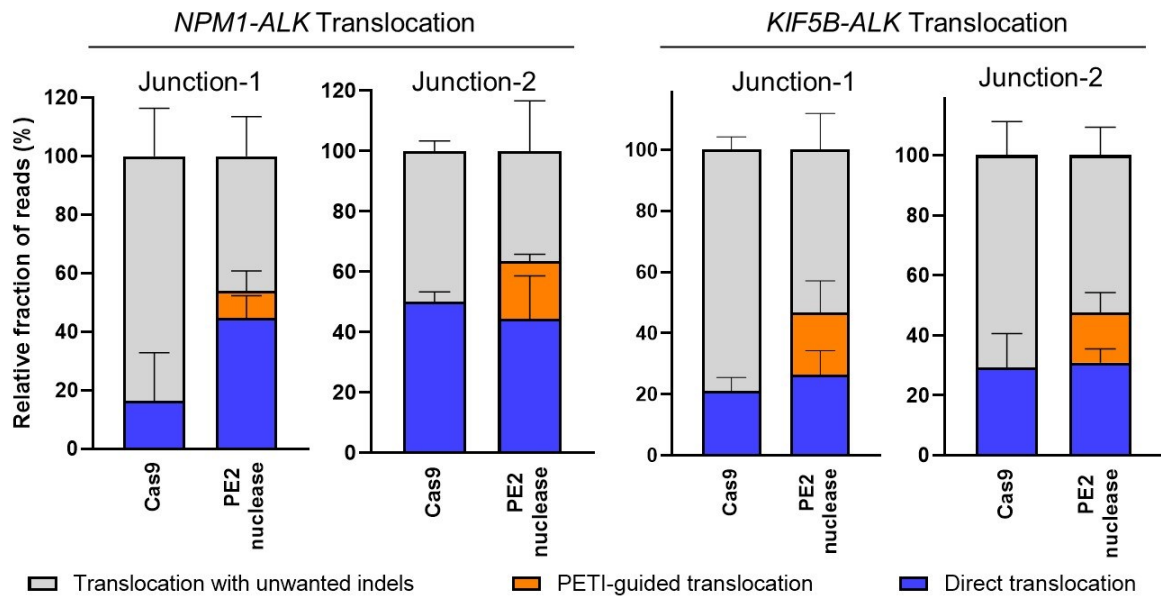

**b**

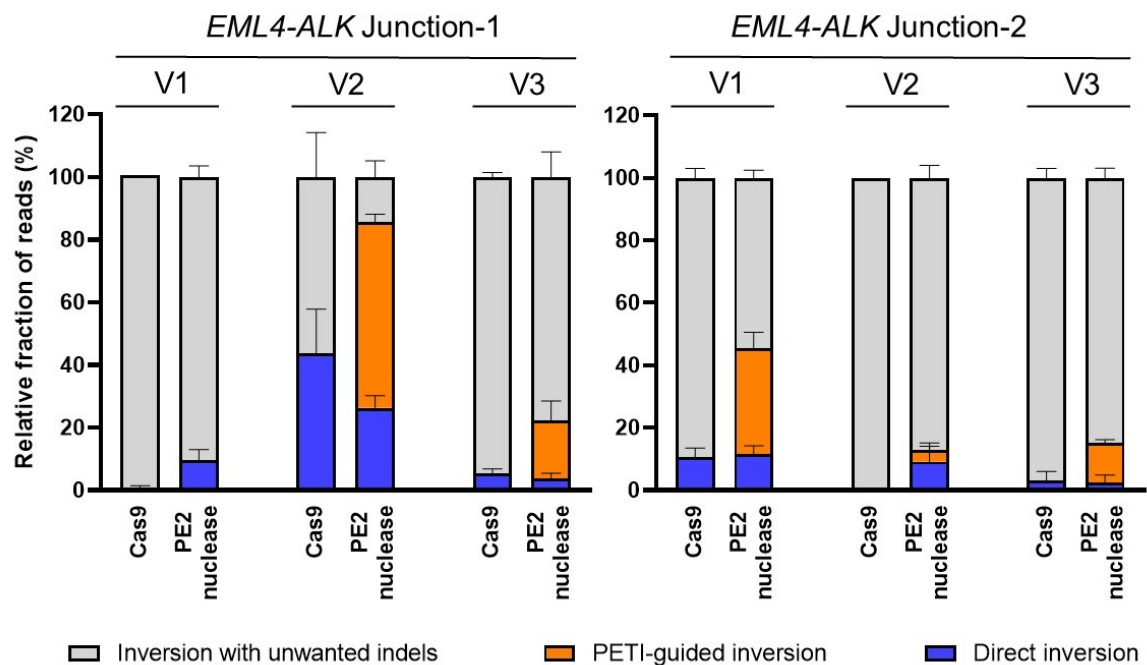

**Figure S11. PCR assay for three types of *EML4-ALK* inversions in HEK293T cells.** (a) PCR assay for inversions. Products were amplified by inversion-specific primers. (b) Detection of the *EML4-ALK* fusion transcript by RT-PCR using inversion-specific primers. Total RNA from HEK293T cells transfected with plasmids encoding PE2, Cas9 nuclease, or PE2 nuclease was used as template.

**a**

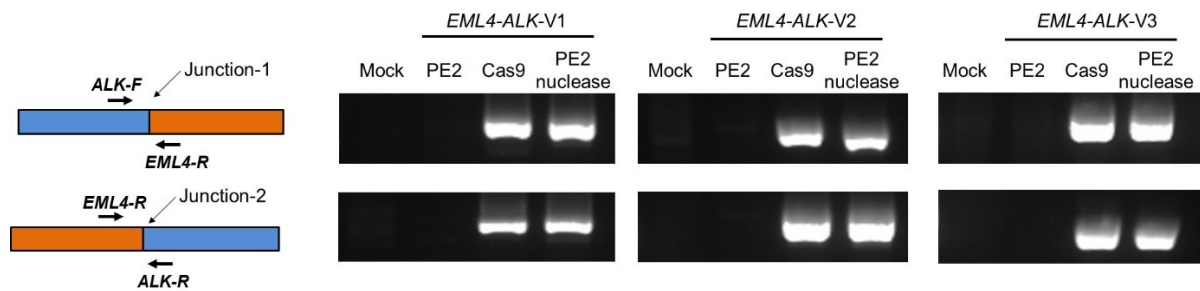

**b**

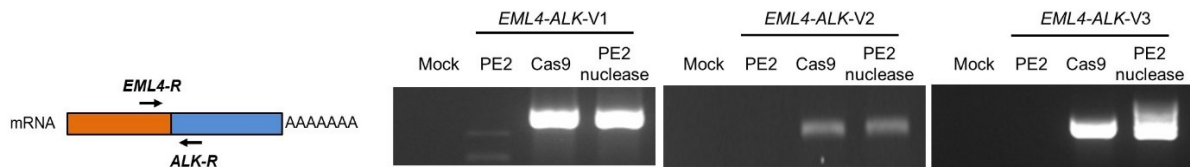



**Figure S13. Analysis of PETI-mediated chromosomal translocation and inversion with various length of RTT in each pegRNAs.** (a) Targeted deep sequencing results of amplicons generated using HEK3-HEK4 translocation-specific primers. (b) Targeted sequencing results of amplicons generated using *EML4-ALK* translocation-specific primers.

**a**

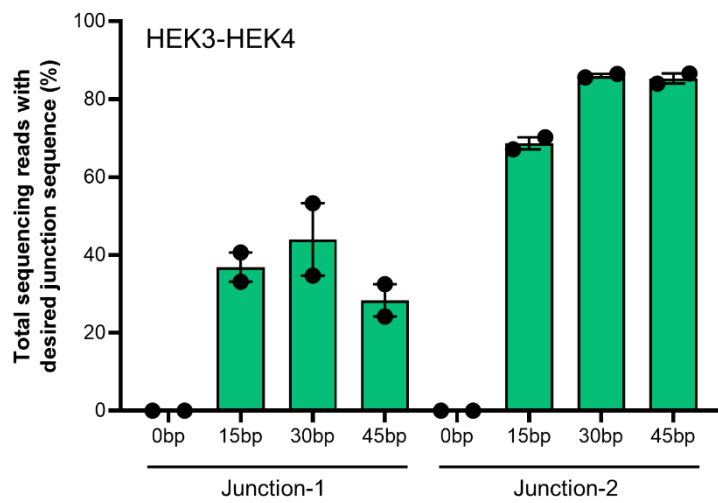

**b**

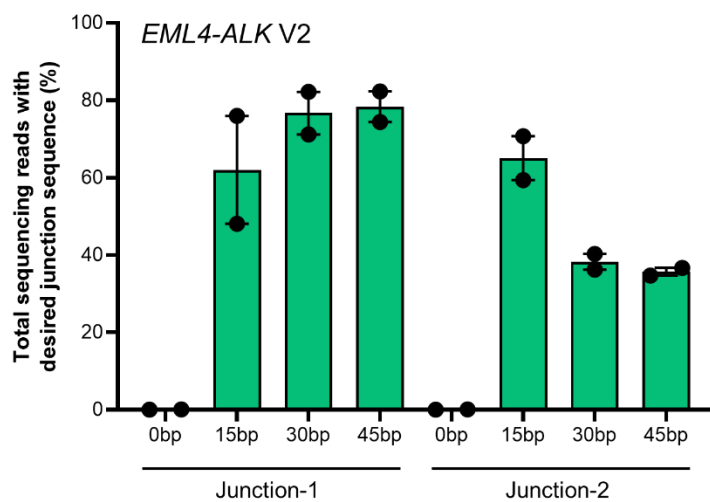

**Figure S14. PCR assay for insertion of attP site at translocation junctions in HEK293T cells.**

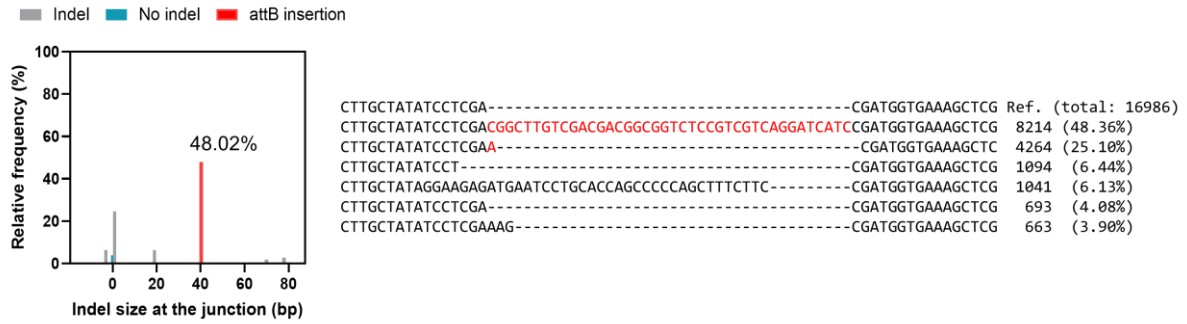

**Table S1. Sequences of pegRNAs used in the experiments.**

| pegRNA name | Target gene | RT-name                | Spacer sequence       |     | PBS (5' to 3', 13 nt) | RTT sequence (5' to 3')             |
|-------------|-------------|------------------------|-----------------------|-----|-----------------------|-------------------------------------|
| HEK3-E1     | HEK3        | E-HEK4-Perfect         | ggcccagactgagcacgtga  | TGG | cagactgagcacg         | tgggggtaaagcggagactctggTgctgt       |
| HEK3-E2     | HEK3        | E-HEK4-EcoRI-ins       | ggcccagactgagcacgtga  | TGG | cagactgagcacg         | AATTCtgggggtaaagcggagactctggTgctgt  |
| HEK3-E3     | HEK3        | E-HEK4-3bp-del         | ggcccagactgagcacgtga  | TGG | cagactgagcacg         | gggtaaagcggagactctggTgctgtg         |
| HEK4-E1     | HEK4        | E-HEK3-Perfect         | ggcactgcggctggaggtgg  | GGG | ctgcggctggagg         | tgtggcagagaaaggaagccctgctcc         |
| HEK4-E2     | HEK4        | E-HEK3-BamHI-ins       | ggcactgcggctggaggtgg  | GGG | ctgcggctggagg         | ATCCtgalggcagagaaaggaagccctgctcc    |
| HEK4-E3     | HEK4        | E-HEK3-3bp-del         | ggcactgcggctggaggtgg  | GGG | ctgcggctggagg         | tggcagagaaaggaagccctgctcc           |
| ALK-V1      | ALK         | ALK-1-BamHI-EXT        | gcgagctttcaccatcgta   | TGG | gctttcaccatcg         | GGATCCtgalggcctaataaacagcccagtttctg |
| EML4-V1     | EML4        | EML4-2-EcoRI-EXT       | attcagctgtaccaatgtga  | TGG | agctgtaccaatg         | GAATTCtgalggcactgaaggagctccccaccccc |
| ALK-V2      | ALK         | ALK-EML4-V2(EcoRI)-EXT | tccttcagtgccatcacga   | TGG | tcagtgccatca          | GAATTCtaaggatgagaatcacaatgtgattc    |
| ELM4-V2     | EML4        | EML4-V2(BamHI)-EXT     | gcataatggtatgctgagcta | AGG | atgttatgctgag         | GGATCCcgaatggaaagctgccccaccccctaga  |
| ALK-NPM1    | ALK         | ALK-NPM1(BamHI)-EXT    | gcgagctttcaccatcgta   | TGG | gctttcaccatcg         | GATCCtgggatataagcaagctatgacacatca   |
| NPM1        | NPM1        | NPM1(EcoRI)-EXT        | gtgaaccagtagcagttcg   | AGG | accagtagcagt          | GAATTCtgggacactgaaggagctccccaccccc  |
| ALK-V3      | ALK         | ALK-EML4-V3(BamHI)-EXT | gcgagctttcaccatcgta   | TGG | gctttcaccatcg         | GATCCtctggctacagtaatacacaatttagc    |
| EML4-V3     | EML4        | EML4-V3(EcoRI)-EXT     | tgatcaaccgcaactcttcc  | TGG | caaccgcaactct         | GAATTCtgggacactgaaggagctccccaccccc  |

## References

1. Hu, Y, and Smyth, GK (2009). ELDA: extreme limiting dilution analysis for comparing depleted and enriched populations in stem cell and other assays. *J Immunol Methods* **347**: 70-78.
